# Supplementary material for: Structural diversity of four lanthanide metal–organic frameworks based on 2,6-naphthalenedicarboxylate: synthesis, structures and photoluminescent properties
Source: Royal Society of Chemistry journal article supplement (doi:10.1039/d0ce01448f), 2020-12-28
Supplement: d0ce01448f1.pdf [file d0ce01448f1.pdf]

**Supporting Information for:**

**Structural Diversity of Four Lanthanide Metal-Organic Frameworks based on  
2,6-Naphthalenedicarboxylate: Synthesis, Structures and Photoluminescent Properties**

Ana R. K. Chatenever<sup>†</sup>, Joe E. Matsuoka<sup>†</sup>, Stanley J. Wang<sup>†</sup>, Beatriz Ehlke<sup>†</sup>, Pierre Le  
Maguerès<sup>§</sup>, Eric W. Reinheimer<sup>§</sup>, Xueling Song<sup>‡</sup>, Honghan Fei<sup>‡</sup> and Scott R. J. Oliver<sup>\*†</sup>

<sup>†</sup> University of California, Santa Cruz, Department of Chemistry and Biochemistry, 1156 High  
Street, Santa Cruz, California 95064

<sup>§</sup> Rigaku Americas Corporation, 9009 New Trails Drive, The Woodlands, Texas 77381

<sup>‡</sup> Tongji University, School of Chemical Science and Engineering, 1239 Siping Road, Shanghai,  
China 200092

**Table of Contents:**

|                                                                                |         |
|--------------------------------------------------------------------------------|---------|
| <b>Figure S1.</b> Optical micrographs.....                                     | Page S2 |
| <b>Figure S2.</b> PXRD of SLUG-49 (La).....                                    | Page S3 |
| <b>Figure S3.</b> PXRD of SLUG-50 (Nd).....                                    | Page S4 |
| <b>Figure S4.</b> PXRD of SLUG-51 (Eu).....                                    | Page S5 |
| <b>Figure S5.</b> PXRD of SLUG-52 (Gd).....                                    | Page S6 |
| <b>Figure S6.</b> $\pi$ -stacking of NDC in SLUG-50 (Nd) and SLUG-51 (Eu)..... | Page S7 |
| <b>Figure S7.</b> PXRD of SLUG-50 (Nd) (bottom) after aqueous conditions.....  | Page S7 |
| <b>Figure S8.</b> PXRD and FTIR (B) of 2,6-naphthalenedicarboxylic acid.....   | Page S8 |
| <b>Figure S9.</b> Physisorption analysis of SLUG-51(Eu).....                   | Page S8 |
| <b>Table S1.</b> Void volumes calculated using PLATON.....                     | Page S9 |

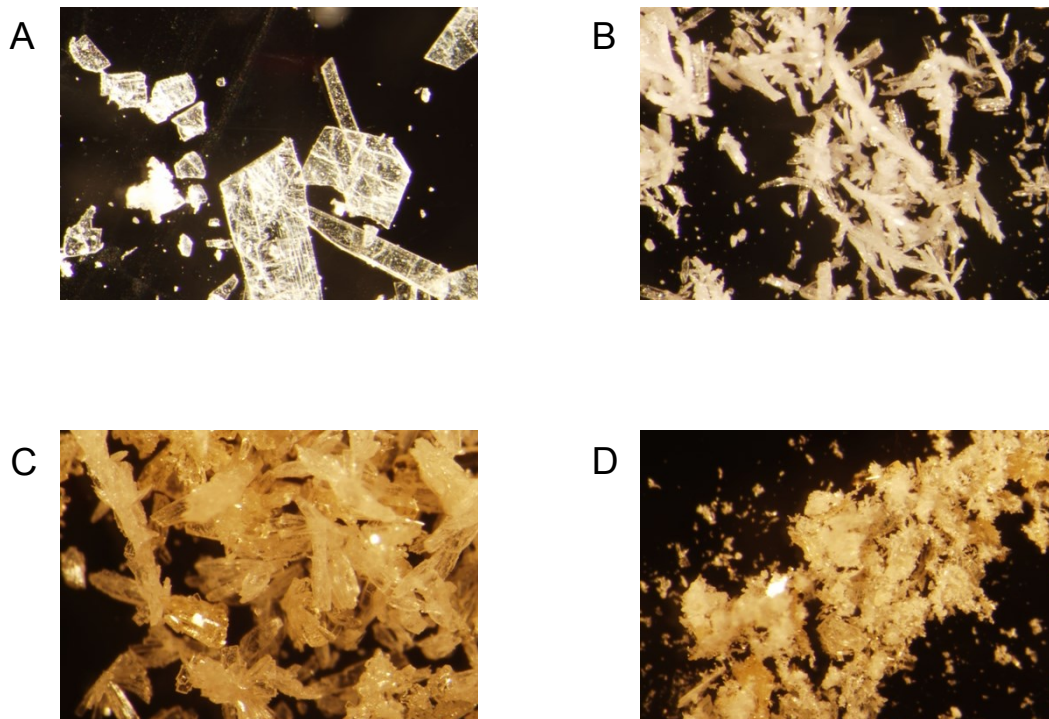

**Figure S1.** Optical micrographs of the powders of A) SLUG-49 (La); B) SLUG-50 (Nd);  
C) SLUG-51 (Eu); D) SLUG-52 (Gd).

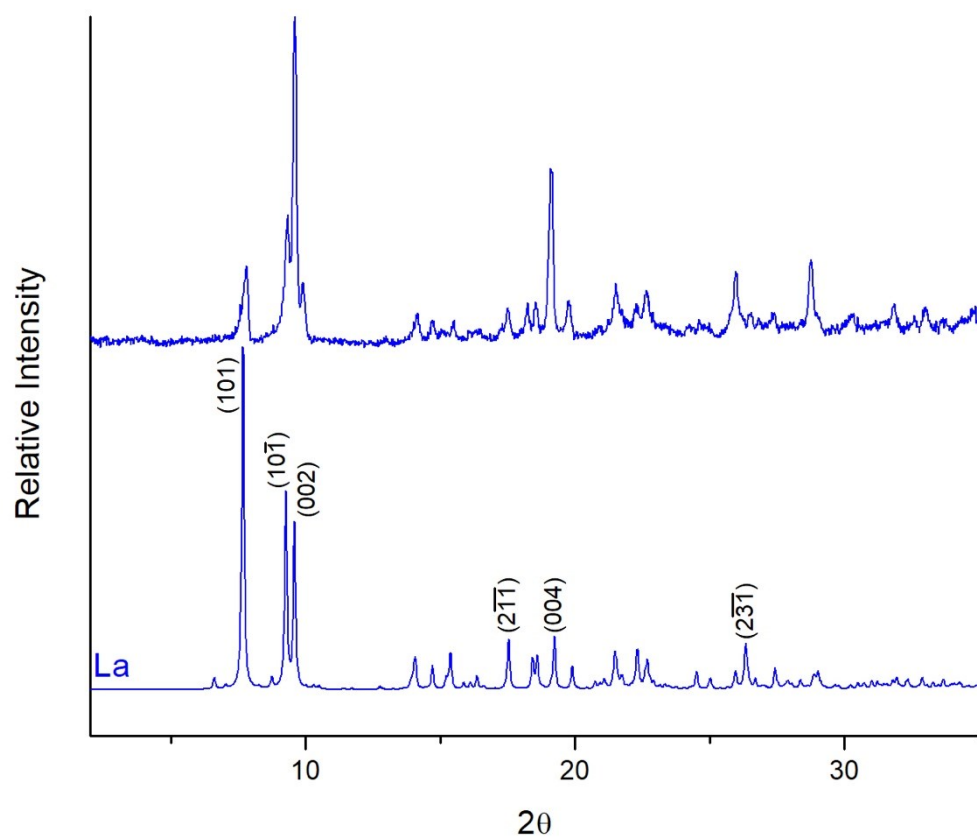

**Figure S2.** Comparison of the theoretical PXRD of SLUG-49 (La) (bottom) with as-synthesized (top).

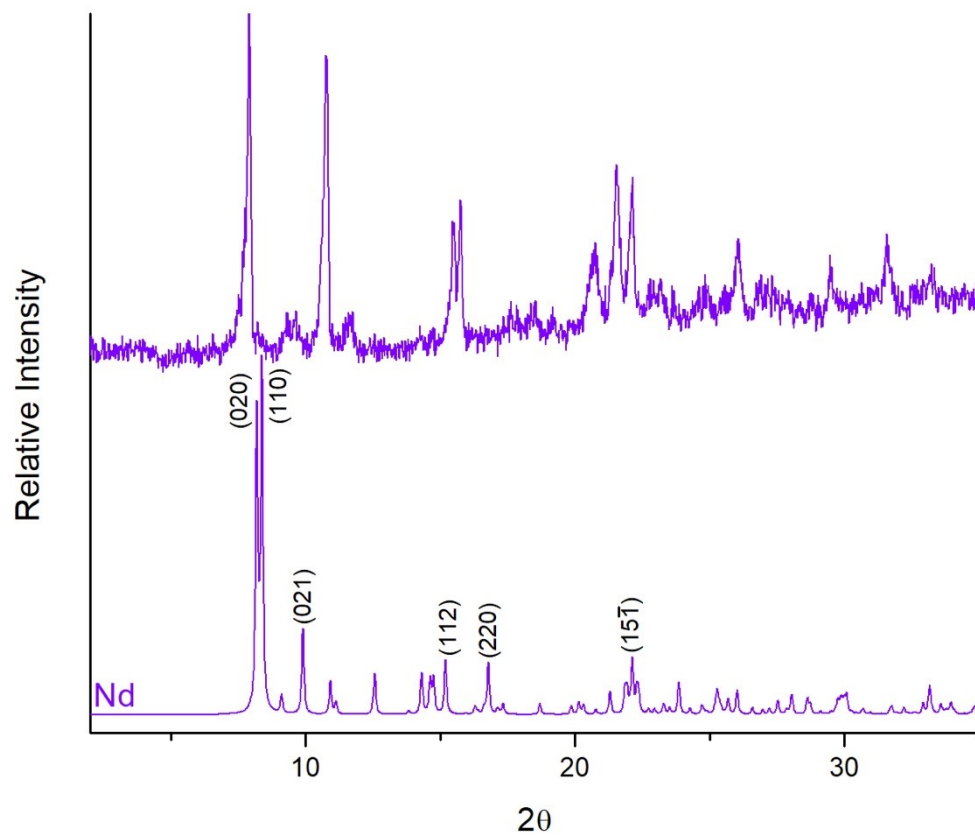

**Figure S3.** Comparison of the theoretical PXRD of SLUG-50 (Nd) (bottom) with as-synthesized (top).

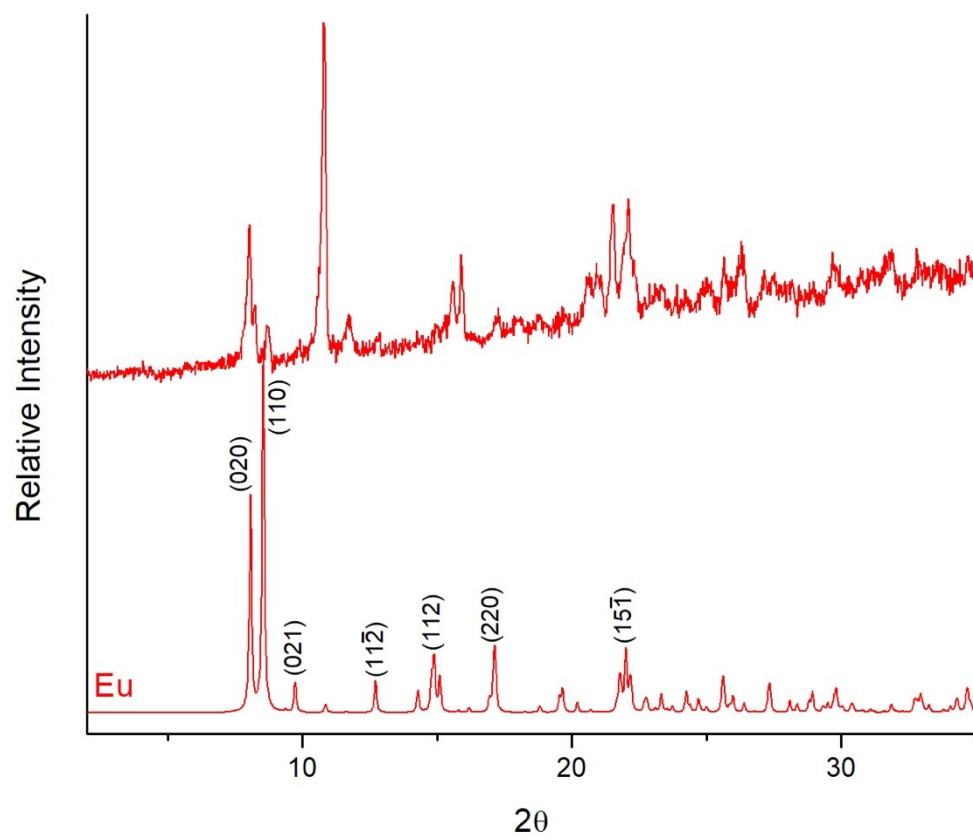

**Figure S4.** Comparison of the theoretical PXRD of SLUG-51 (Eu) (bottom) with as-synthesized (top).

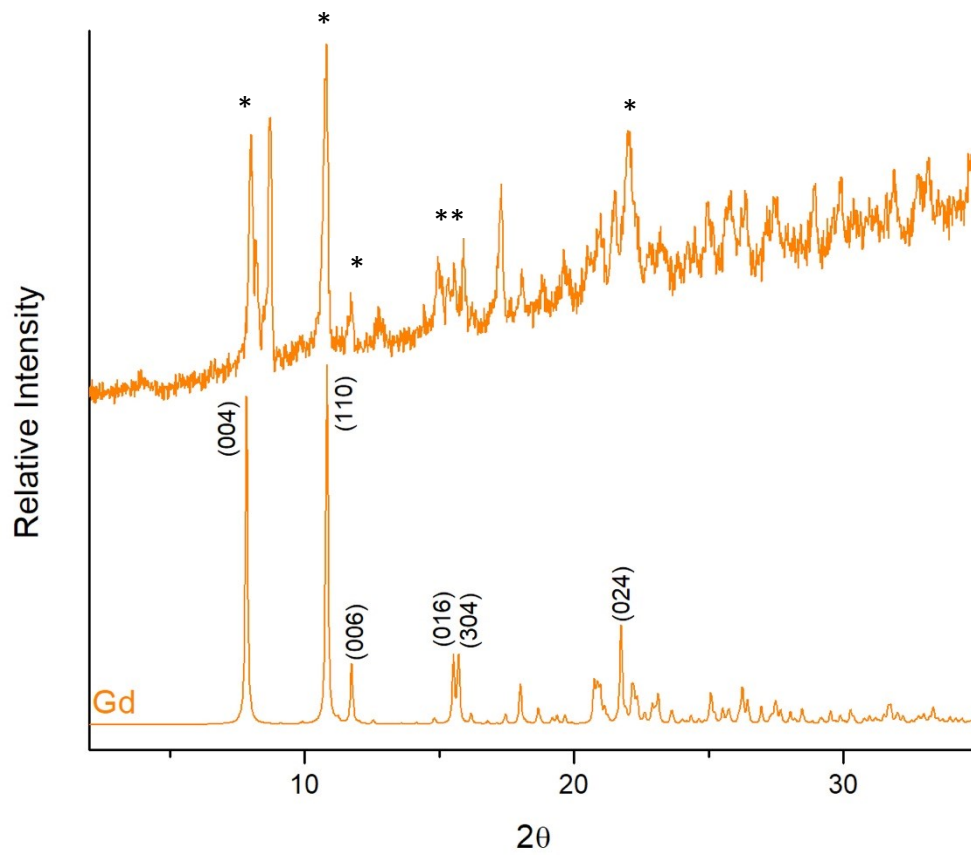

**Figure S5.** Comparison of the theoretical PXRD of SLUG-52 (Gd) (bottom, asterisks) with as-synthesized (top). An additional as-yet unknown phase is present in the as-synthesized sample.

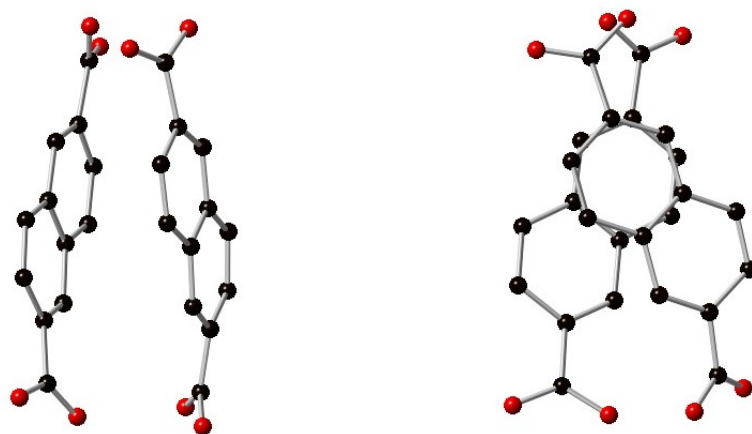

**Figure S6.** Observed  $\pi$ -stacking of NDC in SLUG-50 (Nd) and SLUG-51 (Eu).

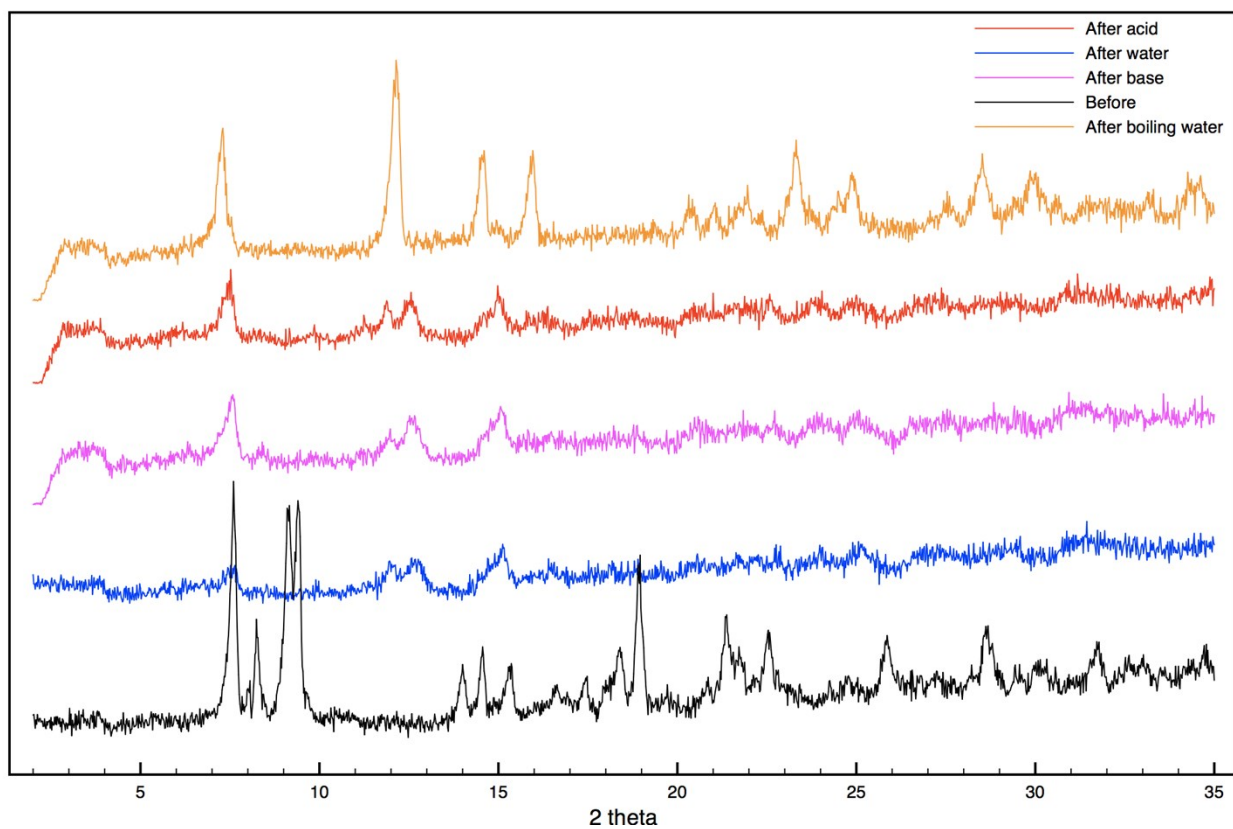

**Figure S7.** PXRD of SLUG-50 (Nd) (bottom) as an example after treatment in various aqueous conditions (acidic pH was 4.6 and basic pH was 9.6); all were static for 2 h.

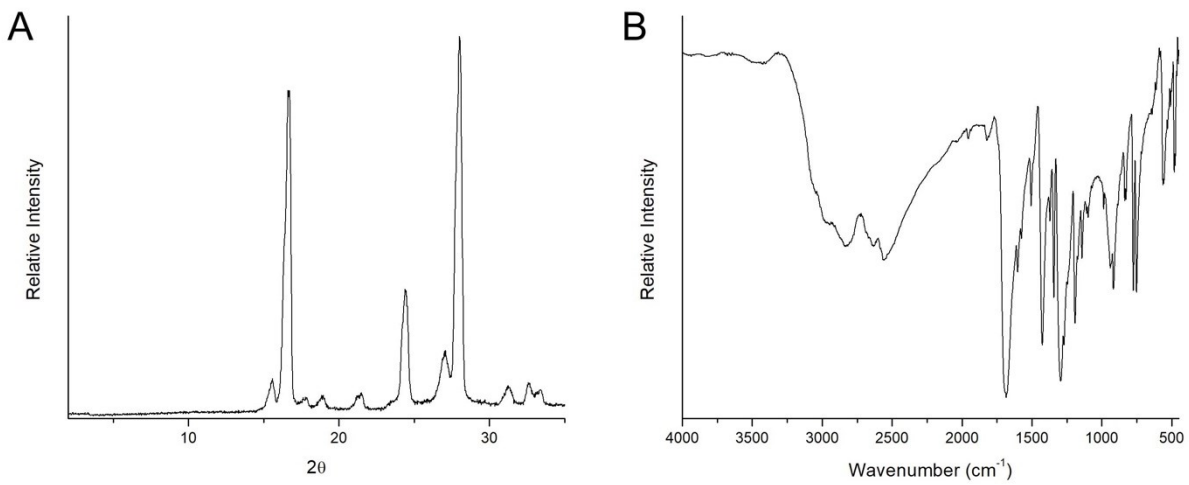

**Figure S8.** PXRD (A) and FTIR (B) of 2,6-naphthalenedicarboxylic acid.

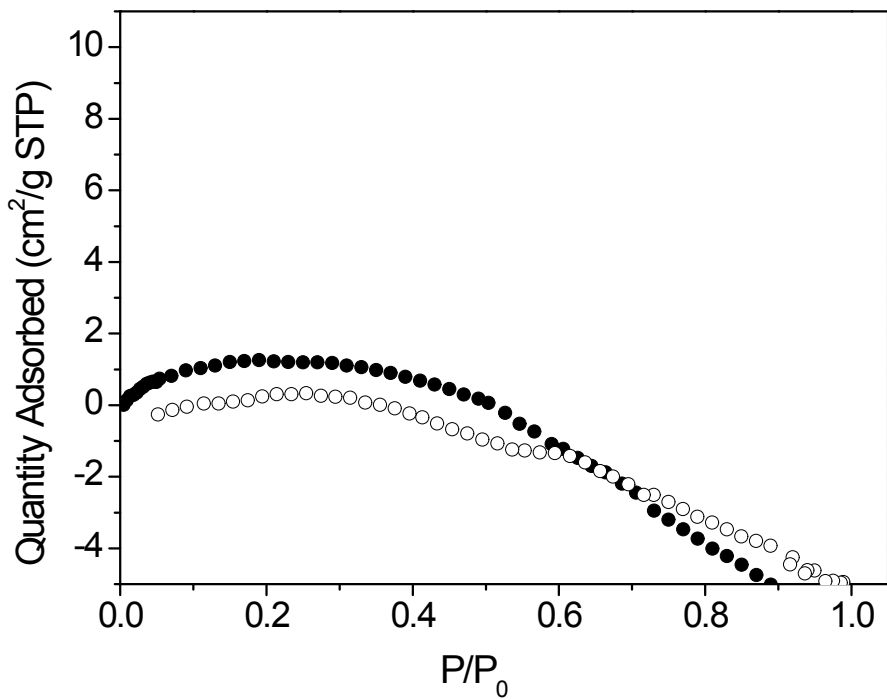

**Figure S9.** Physiosorption analysis of SLUG-51(Eu).



**Table S1.** Void volumes calculated using PLATON

|                               | <b>SLUG-49</b>                     | <b>SLUG-50</b>                     | <b>SLUG-51</b>                     | <b>SLUG-52</b>                     |
|-------------------------------|------------------------------------|------------------------------------|------------------------------------|------------------------------------|
| <b>Total unit cell volume</b> | 3403.54 Å <sup>3</sup>             | 4263.68 Å <sup>3</sup>             | 4238.51 Å <sup>3</sup>             | 7679.98 Å <sup>3</sup>             |
| <b>Volume occupied</b>        | 2435.91 Å <sup>3</sup> ,<br>71.57% | 2981.17 Å <sup>3</sup> ,<br>69.92% | 2913.98 Å <sup>3</sup> ,<br>68.75% | 5361.39 Å <sup>3</sup> ,<br>69.81% |
| <b>Void volume</b>            | 967.63 Å <sup>3</sup> ,<br>28.43%  | 1282.51 Å <sup>3</sup> ,<br>30.08% | 1324.53 Å <sup>3</sup> ,<br>31.25% | 2318.59 Å <sup>3</sup> ,<br>30.19% |
